# Supplementary material
Source: HighWire-hosted journal article supplement (https://bmjopen.bmj.com/content/12/11/e064978)
Supplement: inline-supplementary-material-2 [file inline-supplementary-material-2.pdf]

APPENDIX 2. Search strategies

1.English electronic databases

| Table 1    Search strategy for PubMed                                                                                                                                                                                                                                                                                                                                                                                                                                                                                                                                                                                                                                                                                                                                                                                                                                                                                                                                                                                                                                                                                                                                                                                                                                                                                                                                                                                                                                                                                                                                                                                                                                                                                                                   |
|---------------------------------------------------------------------------------------------------------------------------------------------------------------------------------------------------------------------------------------------------------------------------------------------------------------------------------------------------------------------------------------------------------------------------------------------------------------------------------------------------------------------------------------------------------------------------------------------------------------------------------------------------------------------------------------------------------------------------------------------------------------------------------------------------------------------------------------------------------------------------------------------------------------------------------------------------------------------------------------------------------------------------------------------------------------------------------------------------------------------------------------------------------------------------------------------------------------------------------------------------------------------------------------------------------------------------------------------------------------------------------------------------------------------------------------------------------------------------------------------------------------------------------------------------------------------------------------------------------------------------------------------------------------------------------------------------------------------------------------------------------|
| #1 "Urinary Bladder, Neurogenic"[Mesh]                                                                                                                                                                                                                                                                                                                                                                                                                                                                                                                                                                                                                                                                                                                                                                                                                                                                                                                                                                                                                                                                                                                                                                                                                                                                                                                                                                                                                                                                                                                                                                                                                                                                                                                  |
| #2    (((((((((((((((((((Neurogenic    Urinary    Bladder[Title/Abstract])    OR    (Bladder, Neurogenic[Title/Abstract]))    OR    (Neurogenic    Bladder[Title/Abstract]))    OR    (Urinary Bladder    Neurogenic    Dysfunction[Title/Abstract]))    OR    (Neurogenic    Dysfunction of the Urinary    Bladder[Title/Abstract]))    OR    (Neurogenic    Urinary    Bladder Disorder[Title/Abstract]))    OR    (Neuropathic Bladder[Title/Abstract]))    OR    (Urinary Bladder Disorder, Neurogenic[Title/Abstract]))    OR    (Bladder Disorder, Neurogenic[Title/Abstract]))    OR    (Neurogenic    Bladder    Disorders[Title/Abstract]))    OR    (Neurogenic    Bladder Disorder[Title/Abstract]))    OR    (Urinary    Bladder    Neurogenesis[Title/Abstract]))    OR    (Neurogenesis,    Urinary    Bladder[Title/Abstract]))    OR    (Bladder Neurogenesis[Title/Abstract]))    OR    (Neurogenesis,    Bladder[Title/Abstract]))    OR    (Neurogenic    Urinary    Bladder,    Atonic[Title/Abstract]))    OR    (Neurogenic    Bladder, Atonic[Title/Abstract]))    OR    (Atonic    Neurogenic    Bladder[Title/Abstract]))    OR    (Neurogenic Urinary    Bladder,    Spastic[Title/Abstract]))    OR    (Neurogenic    Bladder, Spastic[Title/Abstract]))    OR    (Spastic    Neurogenic    Bladder[Title/Abstract]))    OR    (Neurogenic Urinary    Bladder,    Uninhibited[Title/Abstract]))    OR    (Neurogenic    Bladder, Uninhibited[Title/Abstract]))    OR    (Uninhibited    Neurogenic    Bladder[Title/Abstract]))    OR    (Neurogenic    lower    urinary    tract    dysfunction[Title/Abstract]))    OR    (Neurogenic urethra[Title/Abstract]))    OR    (Neurogenic urinary incontinence[Title/Abstract]) |
| #3    #1 or #2                                                                                                                                                                                                                                                                                                                                                                                                                                                                                                                                                                                                                                                                                                                                                                                                                                                                                                                                                                                                                                                                                                                                                                                                                                                                                                                                                                                                                                                                                                                                                                                                                                                                                                                                          |
| #4    "Practice Guideline" [Publication Type]                                                                                                                                                                                                                                                                                                                                                                                                                                                                                                                                                                                                                                                                                                                                                                                                                                                                                                                                                                                                                                                                                                                                                                                                                                                                                                                                                                                                                                                                                                                                                                                                                                                                                                           |
| #5    (((((((((((((((Clinical    Practice    Guideline[Title/Abstract])    OR    (Clinical Guidelines[Title/Abstract]))    OR    (guide[Title/Abstract]))    OR    (guideline[Title/Abstract]))    OR    (guidance[Title/Abstract]))    OR    (best    practice    guideline[Title/Abstract]))    OR    (recommended    practice[Title/Abstract]))    OR    (evidence-based[Title/Abstract]))    OR    (recommendation[Title/Abstract]))    OR    (recommendations[Title/Abstract]))    OR                                                                                                                                                                                                                                                                                                                                                                                                                                                                                                                                                                                                                                                                                                                                                                                                                                                                                                                                                                                                                                                                                                                                                                                                                                                              |

|                                                                                                 |
|-------------------------------------------------------------------------------------------------|
| (consensus[Title/Abstract])) OR (statement[Title/Abstract])) OR (best practice[Title/Abstract]) |
| <b>#6</b> #4 or #5                                                                              |
| <b>#7</b> #3 and #6 and (2012:2022[pdat])                                                       |

| Table 2 Search strategy for Embase                                                                                                                                                                                                                                                                                                                                                                                                                                                                                                                                                                                                                                                                                                                                                                                                                                                                                                                                                                                                                                                                                                                      |
|---------------------------------------------------------------------------------------------------------------------------------------------------------------------------------------------------------------------------------------------------------------------------------------------------------------------------------------------------------------------------------------------------------------------------------------------------------------------------------------------------------------------------------------------------------------------------------------------------------------------------------------------------------------------------------------------------------------------------------------------------------------------------------------------------------------------------------------------------------------------------------------------------------------------------------------------------------------------------------------------------------------------------------------------------------------------------------------------------------------------------------------------------------|
| <b>#1</b> 'neurogenic bladder'/exp                                                                                                                                                                                                                                                                                                                                                                                                                                                                                                                                                                                                                                                                                                                                                                                                                                                                                                                                                                                                                                                                                                                      |
| <b>#2</b> 'Neurogenic Urinary Bladder':ab,ti OR 'Bladder, Neurogenic':ab,ti OR 'Neurogenic Bladder':ab,ti OR 'Urinary Bladder Neurogenic Dysfunction':ab,ti OR 'Neurogenic Dysfunction of the Urinary Bladder':ab,ti OR 'Neurogenic Urinary Bladder Disorder':ab,ti OR 'Neuropathic Bladder':ab,ti OR 'Urinary Bladder Disorder, Neurogenic':ab,ti OR 'Bladder Disorder, Neurogenic':ab,ti OR 'Neurogenic Bladder Disorders':ab,ti OR 'Neurogenic Bladder Disorder':ab,ti OR 'Urinary Bladder Neurogenesis':ab,ti OR 'Neurogenesis, Urinary Bladder':ab,ti OR 'Bladder Neurogenesis':ab,ti OR 'Neurogenesis, Bladder':ab,ti OR 'Neurogenic Urinary Bladder, Atonic':ab,ti OR 'Neurogenic Bladder, Atonic':ab,ti OR 'Atonic Neurogenic Bladder':ab,ti OR 'Neurogenic Urinary Bladder, Spastic':ab,ti OR 'Neurogenic Bladder, Spastic':ab,ti OR 'Spastic Neurogenic Bladder':ab,ti OR 'Neurogenic Urinary Bladder, Uninhibited':ab,ti OR 'Neurogenic Bladder, Uninhibited':ab,ti OR 'Uninhibited Neurogenic Bladder':ab,ti OR 'Neurogenic lower urinary tract dysfunction':ab,ti OR 'Neurogenic urethra':ab,ti OR 'Neurogenic urinary incontinence':ab,ti |
| <b>#3</b> #1 or #2                                                                                                                                                                                                                                                                                                                                                                                                                                                                                                                                                                                                                                                                                                                                                                                                                                                                                                                                                                                                                                                                                                                                      |
| <b>#4</b> 'practice guideline'/exp                                                                                                                                                                                                                                                                                                                                                                                                                                                                                                                                                                                                                                                                                                                                                                                                                                                                                                                                                                                                                                                                                                                      |
| <b>#5</b> 'Clinical Practice Guideline':ti OR 'Clinical Guidelines':ti OR 'guide ':ti OR 'guideline':ti OR 'guidance ':ti OR 'best practice guideline ':ti OR 'recommended practice ':ti OR 'evidence based':ti OR 'recommendation':ti OR 'recommendations':ti OR 'consensus ':ti OR 'statement':ti OR 'best practice':ti                                                                                                                                                                                                                                                                                                                                                                                                                                                                                                                                                                                                                                                                                                                                                                                                                               |
| <b>#6</b> #4 or #5                                                                                                                                                                                                                                                                                                                                                                                                                                                                                                                                                                                                                                                                                                                                                                                                                                                                                                                                                                                                                                                                                                                                      |
| <b>#7</b> [2012-2022]/py                                                                                                                                                                                                                                                                                                                                                                                                                                                                                                                                                                                                                                                                                                                                                                                                                                                                                                                                                                                                                                                                                                                                |

**#8** #3 and #6 and #7

**Table 3** Search strategy for OVID

**#1** (Urinary Bladder, Neurogenic or Neurogenic Urinary Bladder or Bladder, Neurogenic or Neurogenic Bladder or Urinary Bladder Neurogenic Dysfunction or Neurogenic Dysfunction of the Urinary Bladder or Neurogenic Urinary Bladder Disorder or Neuropathic Bladder or Urinary Bladder Disorder, Neurogenic or Bladder Disorder, Neurogenic or Neurogenic Bladder Disorders or Neurogenic Bladder Disorder or Urinary Bladder Neurogenesis or Neurogenesis, Urinary Bladder or Bladder Neurogenesis or Neurogenesis, Bladder or Neurogenic Urinary Bladder, Atonic or Neurogenic Bladder, Atonic or Atonic Neurogenic Bladder or Neurogenic Urinary Bladder, Spastic or Neurogenic Bladder, Spastic or Spastic Neurogenic Bladder or Neurogenic Urinary Bladder, Uninhibited or Neurogenic Bladder, Uninhibited or Uninhibited Neurogenic Bladder or Neurogenic lower urinary tract dysfunction or Neurogenic urethra or Neurogenic urinary incontinence).ti,ab,kw.

**#2** (Practice Guideline or guideline or recommendations or statement or guidance or guide or best practice guideline or Clinical Practice Guideline or recommended practice or evidence based or recommendation or consensus or best practice).ti,ab,kw.

**#3** #1 and #2

**#4** limit 3 to yr="2012 - 2022"

**Table 4** Search strategy for Scopus

**#1** TITLE-ABS-KEY("Urinary Bladder, Neurogenic" OR "Neurogenic Urinary Bladder" OR "Bladder, Neurogenic" OR "Neurogenic Bladder" OR "Urinary Bladder Neurogenic Dysfunction" OR "Neurogenic Dysfunction of the Urinary Bladder" OR "Neurogenic Urinary Bladder Disorder" OR "Neuropathic Bladder" OR "Urinary Bladder Disorder, Neurogenic" OR "Bladder Disorder, Neurogenic" OR "Neurogenic Bladder Disorders" OR "Neurogenic Bladder Disorder" OR "Urinary Bladder Neurogenesis" OR "Neurogenesis, Urinary Bladder" OR "Bladder Neurogenesis" OR "Neurogenesis, Bladder" OR

|                                                                                                                                                                                                                                                                                                                                                                                                                                                   |
|---------------------------------------------------------------------------------------------------------------------------------------------------------------------------------------------------------------------------------------------------------------------------------------------------------------------------------------------------------------------------------------------------------------------------------------------------|
| "Neurogenic Urinary Bladder, Atonic" OR "Neurogenic Bladder, Atonic" OR "Atonic Neurogenic Bladder" OR "Neurogenic Urinary Bladder, Spastic" OR "Neurogenic Bladder, Spastic" OR "Spastic Neurogenic Bladder" OR "Neurogenic Urinary Bladder, Uninhibited" OR "Neurogenic Bladder, Uninhibited" OR "Uninhibited Neurogenic Bladder" OR "Neurogenic lower urinary tract dysfunction" OR "Neurogenic urethra" OR "Neurogenic urinary incontinence") |
| <b>#2</b> TITLE-ABS-KEY("Practice Guideline" OR "Clinical Practice Guideline" OR "Clinical Guidelines" OR "guide " OR "guideline" OR "guidance " OR "best practice guideline " OR "recommended practice " OR "evidence based" OR "recommendation" OR "recommendations" OR "consensus " OR "statement" OR "best practice" )                                                                                                                        |
| <b>#3</b> #1 and #2 and PUBYEAR > 2011 and PUBYEAR < 2023                                                                                                                                                                                                                                                                                                                                                                                         |

| Table 5 Search strategy for Web of Science                                                                                                                                                                                                                                                                                                                                                                                                                                                                                                                                                                                                                                                                                                                                                                                                                                                                                                                          |
|---------------------------------------------------------------------------------------------------------------------------------------------------------------------------------------------------------------------------------------------------------------------------------------------------------------------------------------------------------------------------------------------------------------------------------------------------------------------------------------------------------------------------------------------------------------------------------------------------------------------------------------------------------------------------------------------------------------------------------------------------------------------------------------------------------------------------------------------------------------------------------------------------------------------------------------------------------------------|
| <b>#1</b> TS=(Urinary Bladder, Neurogenic or Neurogenic Urinary Bladder or Bladder, Neurogenic or Neurogenic Bladder or Urinary Bladder Neurogenic Dysfunction or Neurogenic Dysfunction of the Urinary Bladder or Neurogenic Urinary Bladder Disorder or Neuropathic Bladder or Urinary Bladder Disorder, Neurogenic or Bladder Disorder, Neurogenic or Neurogenic Bladder Disorders or Neurogenic Bladder Disorder or Urinary Bladder Neurogenesis or Neurogenesis, Urinary Bladder or Bladder Neurogenesis or Neurogenesis, Bladder or Neurogenic Urinary Bladder, Atonic or Neurogenic Bladder, Atonic or Atonic Neurogenic Bladder or Neurogenic Urinary Bladder, Spastic or Neurogenic Bladder, Spastic or Spastic Neurogenic Bladder or Neurogenic Urinary Bladder, Uninhibited or Neurogenic Bladder, Uninhibited or Uninhibited Neurogenic Bladder or Neurogenic lower urinary tract dysfunction or Neurogenic urethra or Neurogenic urinary incontinence) |
| <b>#2</b> TS=(Practice Guideline or guideline or recommendations or statement or guidance or guide or best practice guideline or Clinical Practice Guideline or recommended practice or evidence based or recommendation or consensus or best practice)                                                                                                                                                                                                                                                                                                                                                                                                                                                                                                                                                                                                                                                                                                             |
| <b>#3</b> #1 and #2                                                                                                                                                                                                                                                                                                                                                                                                                                                                                                                                                                                                                                                                                                                                                                                                                                                                                                                                                 |

|                          |
|--------------------------|
| <b>#4</b> PY=(2012-2022) |
| <b>#5</b> #3 and #4      |

| Table 6 Search strategy for Cochrane Library                                                                                                                                                                                                                                                                                                                                                                                                                                                                                                                                                                                                                                                                                                                                                                                                                                                                                                                                                                                                                                                                                                                                                                                                        |
|-----------------------------------------------------------------------------------------------------------------------------------------------------------------------------------------------------------------------------------------------------------------------------------------------------------------------------------------------------------------------------------------------------------------------------------------------------------------------------------------------------------------------------------------------------------------------------------------------------------------------------------------------------------------------------------------------------------------------------------------------------------------------------------------------------------------------------------------------------------------------------------------------------------------------------------------------------------------------------------------------------------------------------------------------------------------------------------------------------------------------------------------------------------------------------------------------------------------------------------------------------|
| <b>#1</b> Urinary Bladder, Neurogenic[Mesh]                                                                                                                                                                                                                                                                                                                                                                                                                                                                                                                                                                                                                                                                                                                                                                                                                                                                                                                                                                                                                                                                                                                                                                                                         |
| <b>#2</b> ( Neurogenic Urinary Bladder):ab,ti,kw OR ( Bladder, Neurogenic):ab,ti,kw OR ( Neurogenic Bladder):ab,ti,kw OR ( Urinary Bladder Neurogenic Dysfunction):ab,ti,kw OR ( Neurogenic Dysfunction of the Urinary Bladder):ab,ti,kw OR ( Neurogenic Urinary Bladder Disorder):ab,ti,kw OR ( Neuropathic Bladder):ab,ti,kw OR ( Urinary Bladder Disorder, Neurogenic):ab,ti,kw OR ( Bladder Disorder, Neurogenic):ab,ti,kw OR ( Neurogenic Bladder Disorders):ab,ti,kw OR (Neurogenic Bladder Disorder):ab,ti,kw OR ( Urinary Bladder Neurogenesis):ab,ti,kw OR (Neurogenesis, Urinary Bladder):ab,ti,kw OR (Bladder Neurogenesis):ab,ti,kw OR (Neurogenesis, Bladder):ab,ti,kw OR (Neurogenic Urinary Bladder, Atonic):ab,ti,kw OR (Neurogenic Bladder, Atonic):ab,ti,kw OR (Atonic Neurogenic Bladder):ab,ti,kw OR (Neurogenic Urinary Bladder, Spastic):ab,ti,kw OR (Neurogenic Bladder, Spastic):ab,ti,kw OR (Spastic Neurogenic Bladder):ab,ti,kw OR (Neurogenic Urinary Bladder, Uninhibited):ab,ti,kw OR (Neurogenic Bladder, Uninhibited):ab,ti,kw OR (Uninhibited Neurogenic Bladder):ab,ti,kw OR (Neurogenic lower urinary tract dysfunction):ab,ti,kw OR (Neurogenic urethra):ab,ti,kw OR (Neurogenic urinary incontinence):ab,ti,kw |
| <b>#3</b> #1 or #2                                                                                                                                                                                                                                                                                                                                                                                                                                                                                                                                                                                                                                                                                                                                                                                                                                                                                                                                                                                                                                                                                                                                                                                                                                  |
| <b>#4</b> Practice Guideline[Mesh]                                                                                                                                                                                                                                                                                                                                                                                                                                                                                                                                                                                                                                                                                                                                                                                                                                                                                                                                                                                                                                                                                                                                                                                                                  |
| <b>#5</b> (Clinical Practice Guideline):ab,ti,kw OR (Clinical Guidelines):ab,ti,kw OR (guide ):ab,ti,kw OR (guideline):ab,ti,kw OR (guidance ):ab,ti,kw OR (best practice guideline ):ab,ti,kw OR (recommended practice ):ab,ti,kw OR (evidence based):ab,ti,kw OR (recommendation):ab,ti,kw OR (recommendations):ab,ti,kw OR (consensus ):ab,ti,kw OR (statement):ab,ti,kw OR (best practice):ab,ti,kw                                                                                                                                                                                                                                                                                                                                                                                                                                                                                                                                                                                                                                                                                                                                                                                                                                             |
| <b>#6</b> #4 or #5                                                                                                                                                                                                                                                                                                                                                                                                                                                                                                                                                                                                                                                                                                                                                                                                                                                                                                                                                                                                                                                                                                                                                                                                                                  |
| <b>#7</b> #3 and #6                                                                                                                                                                                                                                                                                                                                                                                                                                                                                                                                                                                                                                                                                                                                                                                                                                                                                                                                                                                                                                                                                                                                                                                                                                 |

| Table 7 Search strategy for CINAHL |                                                                                                                                                                                                                                                                                                                                                                                                                                                    |
|------------------------------------|----------------------------------------------------------------------------------------------------------------------------------------------------------------------------------------------------------------------------------------------------------------------------------------------------------------------------------------------------------------------------------------------------------------------------------------------------|
| <b>#1</b>                          | TX Urinary Bladder, Neurogenic OR TX Neurogenic Urinary Bladder OR TX Bladder, Neurogenic OR TX Neurogenic Bladder OR TX Urinary Bladder Neurogenic Dysfunction OR TX Neurogenic Dysfunction of the Urinary Bladder OR TX Neurogenic Urinary Bladder Disorder OR TX Neuropathic Bladder OR TX Urinary Bladder Disorder, Neurogenic OR TX Neurogenic lower urinary tract dysfunction OR TX Neurogenic urethra OR TX Neurogenic urinary incontinence |
| <b>#2</b>                          | TI Practice Guideline OR TI Clinical Practice Guideline OR TI Clinical Guidelines OR TI guide OR TI guideline OR TI guidance OR TI best practice guideline OR TI recommended practice OR TI evidence based OR TI recommendation OR TI consensus OR TI best practice                                                                                                                                                                                |
| <b>#3</b>                          | #1 and #2                                                                                                                                                                                                                                                                                                                                                                                                                                          |

| Table 8 Search strategy for UpToDate                                                                                                                                                                    |
|---------------------------------------------------------------------------------------------------------------------------------------------------------------------------------------------------------|
| <b>Combinations of the following keywords will be used for the search:</b><br>“neurogenic bladder”, “neurogenic lower urinary tract dysfunction”, “neuro-urology”,<br>“neurogenic urinary incontinence” |

| Table 9 Search strategy for Best Practice                                                                                                                                                               |
|---------------------------------------------------------------------------------------------------------------------------------------------------------------------------------------------------------|
| <b>Combinations of the following keywords will be used for the search:</b><br>“neurogenic bladder”, “neurogenic lower urinary tract dysfunction”, “neuro-urology”,<br>“neurogenic urinary incontinence” |

2.Chinese electronic databases

|                                                                                                                                                                                                                                    |
|------------------------------------------------------------------------------------------------------------------------------------------------------------------------------------------------------------------------------------|
| Table 1    Search strategy for China National Knowledge Infrastructure                                                                                                                                                             |
| (主题: 膀胱, 神经原性(精确) ) OR (主题: 神经源性膀胱(精确) ) OR (主题: 神经源性下尿路功能障碍(精确) ) OR (主题: 神经源性尿道 (精确) ) OR (主题: 神经源性尿失禁(精确) ) AND ( (主题: 指南(精确) ) OR (主题: 实践指南(精确) ) OR (主题: 临床实践指南(精确) ) OR (主题:最佳实践指南(精确) ) OR (主题:推荐实践(精确) ) OR (主题:循证(精确) ) ) |

|                                                                                                                      |
|----------------------------------------------------------------------------------------------------------------------|
| Table 2    Search strategy for Wanfang Database                                                                      |
| 检索表达式（中英文扩展&主题词扩展）： 主题:(神经源性膀胱+神经源性下尿路功能障碍+神经源性尿道+神经源性尿失禁) and 主题:(指南+实践指南+临床实践指南+最佳实践指南+推荐实践+循证) and Date:2012-2022 |

|                                                                                                                                                                                                                                     |
|-------------------------------------------------------------------------------------------------------------------------------------------------------------------------------------------------------------------------------------|
| Table 3    Search strategy for VIP Periodical Resource Integration Service Platform                                                                                                                                                 |
| (((题名或关键词=膀胱, 神经原性 OR 题名或关键词=神经源性膀胱) OR 题名或关键词=神经源性下尿路功能障碍) OR 题名或关键词=神经源性尿道) OR 题名或关键词=神经源性尿失禁) AND (((((((题名或关键词=指南 OR 题名或关键词=实践指南) OR 题名或关键词=临床实践指南) OR 题名或关键词=最佳实践指南) OR 题名或关键词=推荐实践) OR 题名或关键词=循证)) AND (years:[2012 TO 2022]) |

|                                        |
|----------------------------------------|
| Table 4    Search strategy for SinoMed |
| #1    "膀胱, 神经原性"[不加权:扩展]               |
| #2    神经源性膀胱                           |
| #3    神经源性下尿路功能障碍                      |
| #4    神经源性尿道                           |

|     |                                     |
|-----|-------------------------------------|
| #5  | 神经源性尿失禁                             |
| #6  | #1 or #2 or #3 or #4 or #5          |
| #7  | "指南"[不加权:扩展]                        |
| #8  | 实践指南                                |
| #9  | 临床实践指南                              |
| #10 | 最佳实践指南                              |
| #11 | 推荐实践                                |
| #12 | 循证                                  |
| #13 | #7 or #8 or #9 or #10 or #11 or #12 |
| #14 | #6 and #13 and 2012-2022[日期]        |

### 3.Online guideline repositories

Combinations of the following keywords will be used for the search:

“neurogenic bladder”, “neurogenic lower urinary tract dysfunction”, “neuro-urology”,  
“neurogenic urinary incontinence”

| Online guide repository name                                          | Website                                                                               |
|-----------------------------------------------------------------------|---------------------------------------------------------------------------------------|
| 1.National Guidelines Clearinghouse (NGC)                             | <a href="https://www.ahrq.gov/gam/index.html">https://www.ahrq.gov/gam/index.html</a> |
| 2.Guidelines International Network (GIN)                              | <a href="http://www.g-i-n.net/">http://www.g-i-n.net/</a>                             |
| 3.New Zealand Guidelines Group (NZGG)                                 | <a href="http://www.nzgg.org.nz/">http://www.nzgg.org.nz/</a>                         |
| 4.Registered Nurses’ Association of Ontario (RNAO)                    | <a href="https://communities.rnao.ca/">https://communities.rnao.ca/</a>               |
| 5.The Australian National Health and Medical Research Council (NHMRC) | <a href="https://www.nhmrc.gov.au/guidelines">https://www.nhmrc.gov.au/guidelines</a> |
| 6.Queensland Coding Committee (QCC)                                   | <a href="https://www.health.qld.gov.au/">https://www.health.qld.gov.au/</a>           |
| 7.Scottish Intercollegiate Guidelines Network(SIGN)                   | <a href="http://www.sign.ac.uk/">http://www.sign.ac.uk/</a>                           |
| 8.National Institute for Health and Care Excellence (NICE)            | <a href="https://www.nice.org.uk/">https://www.nice.org.uk/</a>                       |
| 9.Canadian Medical Association Clinical Practice                      | <a href="https://joulecma.ca/cpg/homepage">https://joulecma.ca/cpg/homepage</a>       |

|                                                             |                                                                       |
|-------------------------------------------------------------|-----------------------------------------------------------------------|
| Guidelines Infobase(CMA Infobase)                           |                                                                       |
| 10.Royal Australian College of General Practitioners(RACGP) | <a href="https://www.racgp.org.au/">https://www.racgp.org.au/</a>     |
| 11.ClinicalKey for Nursing                                  | <a href="https://www.clinicalkey.com">https://www.clinicalkey.com</a> |
| 12.Medlive                                                  | <a href="https://guide.medlive.cn">https://guide.medlive.cn</a>       |

#### 4. Urological association websites

Combinations of the following keywords will be used for the search:

**English keywords:** “neurogenic bladder”, “neurogenic lower urinary tract dysfunction”, “neuro-urology”, “neurogenic urinary incontinence”

**Chinese keywords:** “神经源性膀胱”，“神经源性下尿路功能障碍”，“神经源性尿道”，“神经源性尿失禁”

| Urological association website Name                 | Website                                                                                               |
|-----------------------------------------------------|-------------------------------------------------------------------------------------------------------|
| 1.International Continence Society (ICS)            | <a href="https://www.ics.org/">https://www.ics.org/</a>                                               |
| 2.American Urological Association (AUA)             | <a href="https://www.auanet.org/">https://www.auanet.org/</a>                                         |
| 3.British Association of Urological Surgeons (BAUS) | <a href="https://www.baus.org.uk/">https://www.baus.org.uk/</a>                                       |
| 4.European Association of Urology (EAU)             | <a href="https://uroweb.org/guidelines/neuro-urology">https://uroweb.org/guidelines/neuro-urology</a> |
| 5.Canadian Urological Association (CUA)             | <a href="https://www.cua.org/">https://www.cua.org/</a>                                               |
| 6.International Consultation on Incontinence (ICI)  | <a href="http://www.ici-rs.org/">http://www.ici-rs.org/</a>                                           |
| 7.The Chinese Urological Association(CUA)           | <a href="https://cua.cma.org.cn/">https://cua.cma.org.cn/</a>                                         |
