# Supplementary material
Source: HighWire-hosted journal article supplement (https://bmjopen.bmj.com/content/12/11/e064978)
Supplement: inline-supplementary-material-3 [file inline-supplementary-material-3.pdf]

### Appendix 3: AGREE II Score Sheet

| Domain                  | Item |                                                                                                                   | AGREE II Rating   |   |   |   |   |   |                |
|-------------------------|------|-------------------------------------------------------------------------------------------------------------------|-------------------|---|---|---|---|---|----------------|
|                         |      |                                                                                                                   | 1                 | 2 | 3 | 4 | 5 | 6 | 7              |
|                         |      |                                                                                                                   | Strongly Disagree |   |   |   |   |   | Strongly Agree |
| Scope and purpose       | 1    | <i>The overall objective(s) of the guideline is (are) specifically described.</i>                                 |                   |   |   |   |   |   |                |
|                         | 2    | <i>The health question(s) covered by the guideline is (are) specifically described.</i>                           |                   |   |   |   |   |   |                |
|                         | 3    | <i>The population (patients, public, etc.) to whom the guideline is meant to apply is specifically described.</i> |                   |   |   |   |   |   |                |
| Stakeholder involvement | 4    | <i>The guideline development group includes individuals from all the relevant professional groups.</i>            |                   |   |   |   |   |   |                |
|                         | 5    | <i>The views and preferences of the target population (patients, public, etc.) have been sought.</i>              |                   |   |   |   |   |   |                |
|                         | 6    | <i>The target users of the guideline are clearly defined.</i>                                                     |                   |   |   |   |   |   |                |
| Rigor of development    | 7    | <i>Systematic methods were used to search for evidence.</i>                                                       |                   |   |   |   |   |   |                |
|                         | 8    | <i>The criteria for selecting the evidence are clearly described.</i>                                             |                   |   |   |   |   |   |                |
|                         | 9    | <i>The strengths and limitations of the body of evidence are clearly described.</i>                               |                   |   |   |   |   |   |                |
|                         | 10   | <i>The methods for formulating the recommendations are clearly described.</i>                                     |                   |   |   |   |   |   |                |
|                         | 11   | <i>The health benefits, side effects and risks have been considered in formulating the recommendations.</i>       |                   |   |   |   |   |   |                |
|                         | 12   | <i>There is an explicit link between the recommendations and the supporting evidence.</i>                         |                   |   |   |   |   |   |                |

|                                     |           |                                                                                                        |                         |                        |          |          |          |          |    |                          |
|-------------------------------------|-----------|--------------------------------------------------------------------------------------------------------|-------------------------|------------------------|----------|----------|----------|----------|----|--------------------------|
|                                     | <b>13</b> | <i>The guideline has been externally reviewed by experts prior to its publication.</i>                 |                         |                        |          |          |          |          |    |                          |
|                                     | <b>14</b> | <i>A procedure for updating the guideline is provided.</i>                                             |                         |                        |          |          |          |          |    |                          |
| <b>Clarity of presentation</b>      | <b>15</b> | <i>The recommendations are specific and unambiguous.</i>                                               |                         |                        |          |          |          |          |    |                          |
|                                     | <b>16</b> | <i>The different options for management of the condition or health issue are clearly presented.</i>    |                         |                        |          |          |          |          |    |                          |
|                                     | <b>17</b> | <i>Key recommendations are easily identifiable.</i>                                                    |                         |                        |          |          |          |          |    |                          |
| <b>Applicability</b>                | <b>18</b> | <i>The guideline describes facilitators and barriers to its application.</i>                           |                         |                        |          |          |          |          |    |                          |
|                                     | <b>19</b> | <i>The guideline provides advice and/or tools on how the recommendations can be put into practice.</i> |                         |                        |          |          |          |          |    |                          |
|                                     | <b>20</b> | <i>The potential resource implications of applying the recommendations have been considered.</i>       |                         |                        |          |          |          |          |    |                          |
|                                     | <b>21</b> | <i>The guideline presents monitoring and/or auditing criteria.</i>                                     |                         |                        |          |          |          |          |    |                          |
| <b>Editorial independence</b>       | <b>22</b> | <i>The views of the funding body have not influenced the content of the guideline.</i>                 |                         |                        |          |          |          |          |    |                          |
|                                     | <b>23</b> | <i>Competing interests of guideline development group members have been recorded and addressed.</i>    |                         |                        |          |          |          |          |    |                          |
| <b>Overall Guideline Assessment</b> | <b>1</b>  | <i>Rate the overall quality of this guideline.</i>                                                     | <b>1</b>                |                        |          |          |          |          |    | <b>7</b>                 |
|                                     |           |                                                                                                        | Lowest possible quality | <b>2</b>               | <b>3</b> | <b>4</b> | <b>5</b> | <b>6</b> |    | Highest possible quality |
|                                     | <b>2</b>  | <i>I would recommend this guideline for use.</i>                                                       | Yes                     | Yes, with modification |          |          |          |          | No |                          |
|                                     |           |                                                                                                        |                         |                        |          |          |          |          |    |                          |
